# Supplementary material for: Drugs Associated with Increased Urine Oxalate Using FAERS and the VigiAccess Database
Source: Research Square preprint supplement (doi:10.21203/rs.3.rs-6403518/v1), 2025-05-20
Supplement: Supplementary file 1 [file 4949efc1d11a031ec24b23e7.xlsx]

## Sheet: sheet1
Table2 Drugs causing urine oxalate increased in the FAERs database
DrugName	a	b	c	d	ROR (95% CI)	PRR (95% CI)	IC (95% CI)	EBGM (95% CI)
TOPIRAMATE	67	83232	52	55274112	855.66 (595.61-1229.27)	854.98 (595.20-1228.13)	5.85 (5.41-6.29)	374.17 (260.45-537.54)
ALEMTUZUMAB	63	72191	53	55285156	910.31 (631.69-1311.84)	909.52 (631.23-1310.50)	5.79 (5.35-6.24)	416.10 (288.74-599.63)
ACICLOVIR	59	38945	54	55318405	1551.94 (1072.78-2245.14)	1549.60 (1071.44-2241.14)	5.80 (5.33-6.26)	741.04 (512.24-1072.03)
ORLISTAT	47	53222	57	55304137	856.82 (582.28-1260.80)	856.06 (581.88-1259.45)	5.45 (4.94-5.95)	469.64 (319.16-691.07)
AMLODIPINE	36	186787	57	55170583	186.55 (122.90-283.15)	186.51 (122.89-283.08)	4.81 (4.25-5.37)	114.70 (75.57-174.10)
TEDUGLUTIDE	29	46488	58	55310888	594.89 (380.90-929.12)	594.52 (380.73-928.37)	4.80 (4.19-5.41)	396.68 (253.99-619.55)
METHYLPREDNISOLONE	16	84942	58	55272447	179.51 (103.20-312.22)	179.47 (103.19-312.14)	3.93 (3.16-4.71)	140.88 (81.00-245.05)
TERIPARATIDE	8	370542	58	54986855	20.47 (9.77-42.87)	20.47 (9.77-42.87)	2.64 (1.61-3.66)	18.11 (8.65-37.92)
OMEPRAZOLE	3	138724	59	55218677	20.24 (6.34-64.57)	20.24 (6.34-64.56)	1.79 (0.30-3.28)	19.31 (6.05-61.59)
MACROGOL	1	85991	59	55271412	10.89 (1.51-78.63)	10.89 (1.51-78.63)	0.87 (-1.20-2.94)	10.73 (1.49-77.44)
GLATIRAMER	1	137967	59	55219436	6.78 (0.94-48.96)	6.78 (0.94-48.96)	0.80 (-1.28-2.87)	6.69 (0.93-48.27)
MACITENTAN	1	168829	59	55188574	5.54 (0.77-39.99)	5.54 (0.77-39.99)	0.75 (-1.32-2.83)	5.46 (0.76-39.44)
BENDROFLUMETHIAZIDE	1	371	59	55357032	2528.99 (349.47-18301.40)	2522.19 (350.36-18156.98)	1.00 (-1.08-3.08)	2480.17 (342.72-17948.14)
ALENDRONIC ACID	1	324554	59	55032849	2.87 (0.40-20.74)	2.87 (0.40-20.74)	0.56 (-1.51-2.63)	2.84 (0.39-20.52)
DULOXETINE	1	260135	59	55097268	3.59 (0.50-25.91)	3.59 (0.50-25.91)	0.64 (-1.44-2.71)	3.55 (0.49-25.60)
IVACAFTOR	1	8245	59	55349158	113.78 (15.76-821.33)	113.77 (15.76-821.04)	0.99 (-1.09-3.06)	111.89 (15.50-807.67)
LEVOFLOXACIN	1	137937	59	55219466	6.79 (0.94-48.97)	6.79 (0.94-48.97)	0.80 (-1.28-2.87)	6.69 (0.93-48.28)
RIFAMPICIN	1	23479	59	55333924	39.94 (5.53-288.32)	39.94 (5.53-288.29)	0.96 (-1.11-3.04)	39.29 (5.44-283.63)
