# Supplementary material for: Drugs Associated with Increased Urine Oxalate Using FAERS and the VigiAccess Database
Source: Research Square preprint supplement (doi:10.21203/rs.3.rs-6403518/v1), 2025-05-20
Supplement: Supplementary file 2 [file 59c4b6250d5c43121356376a.xlsx]

## Sheet: sheet1
Table3 Drugs causing urine oxalate increased in the VigiAccess database
DrugName	a	b	c	d	ROR (95% CI)	PRR (95% CI)	IC (95% CI)	EBGM (95% CI)
ORLISTAT	92	68985	50	117866209	3143.78 (2227.72-4436.54)	3139.60 (2225.11-4429.91)	6.42 (6.04-6.81)	1106.14 (783.82-1561.00)
ALEMTUZUMAB	87	114514	51	117820684	1755.14 (1242.14-2480)	1753.81 (1241.32-2477.88)	6.28 (5.88-6.67)	648.78 (459.15-916.72)
TOPIRAMATE	76	99785	51	117835424	1759.76 (1234.10-2509.34)	1758.42 (1233.29-2507.16)	6.12 (5.70-6.53)	706.74 (495.62-1007.77)
TERIPARATIDE	73	538988	52	117396223	305.77 (214.25-436.38)	305.73 (214.23-436.31)	5.55 (5.13-5.98)	127.77 (89.53-182.34)
ACICLOVIR	65	87408	53	117847810	1653.51 (1150.38-2376.69)	1652.29 (1149.67-2374.64)	5.92 (5.48-6.37)	742.68 (516.70-1067.50)
ASCORBIC ACID	58	43422	53	117891803	2971.16 (2047.02-4312.50)	2967.20 (2044.78-4305.73)	5.82 (5.36-6.29)	1417.29 (976.46-2057.14)
AMLODIPINE	52	253990	53	117681241	454.59 (310.07-666.46)	454.50 (310.02-666.30)	5.43 (4.95-5.92)	229.91 (156.82-337.06)
METHYLPREDNISOLONE	12	171576	53	117763695	155.40 (83.05-290.80)	155.39 (83.04-290.77)	3.57 (2.69-4.44)	126.89 (67.81-237.44)
LEVOFLOXACIN	9	447438	53	117487836	44.59 (22.00-90.39)	44.59 (22.00-90.39)	3.01 (2.03-3.99)	38.26 (18.87-77.56)
RIFAMPICIN	6	128343	53	117806934	103.91 (44.67-241.73)	103.91 (44.67-241.71)	2.72 (1.56-3.87)	93.44 (40.17-217.37)
IVACAFTOR	1	17083	53	117918199	130.24 (18.01-941.84)	130.23 (18.01-941.67)	0.99 (-1.09-3.07)	127.84 (17.68-924.48)
DESLORATADINE	1	20813	53	117914469	106.89 (14.78-773.01)	106.89 (14.78-772.90)	0.99 (-1.09-3.06)	104.93 (14.51-758.80)
ALENDRONIC ACID	1	316704	53	117618578	7.01 (0.97-50.67)	7.01 (0.97-50.67)	0.80 (-1.28-2.88)	6.90 (0.95-49.87)
ETIDRONIC ACID	1	2930	53	117932352	759.43 (104.99-5493.43)	759.17 (105.02-5487.92)	1 (-1.08-3.08)	745.13 (103.01-5389.99)
GLATIRAMER	1	277951	53	117657331	7.99 (1.10-57.75)	7.99 (1.10-57.75)	0.82 (-1.25-2.9)	7.86 (1.09-56.82)
ADALIMUMAB	1	2083774	53	115851508	1.05 (0.15-7.59)	1.05 (0.15-7.59)	0.02 (-2.06-2.10)	1.05 (0.14-7.58)
CALCIUM CARBONATE	1	17957	53	117917325	123.90 (17.13-895.99)	123.89 (17.13-895.84)	0.99 (-1.09-3.07)	121.62 (16.82-879.48)
GLUCOSE	1	35799	53	117899483	62.14 (8.59-449.35)	62.14 (8.59-449.32)	0.98 (-1.10-3.05)	61.01 (8.44-441.15)
AMITRIPTYLINE	1	95880	53	117839402	23.19 (3.21-167.69)	23.19 (3.21-167.68)	0.94 (-1.14-3.01)	22.78 (3.15-164.71)
DULOXETINE	1	300919	53	117634363	7.38 (1.02-53.34)	7.38 (1.02-53.34)	0.81 (-1.27-2.89)	7.26 (1.00-52.48)
OMEPRAZOLE	1	380491	53	117554791	5.83 (0.81-42.15)	5.83 (0.81-42.15)	0.76 (-1.31-2.84)	5.74 (0.79-41.51)
MACROGOL	1	86048	53	117849234	25.84 (3.57-186.86)	25.84 (3.57-186.86)	0.94 (-1.13-3.02)	25.38 (3.51-183.54)
COLECALCIFEROL	1	25110	53	117910172	88.60 (12.25-640.70)	88.60 (12.25-640.63)	0.98 (-1.09-3.06)	86.97 (12.03-628.95)
MACITENTAN	1	188095	53	117747187	11.81 (1.63-85.41)	11.81 (1.63-85.41)	0.88 (-1.20-2.96)	11.61 (1.61-83.96)
BENDROFLUMETHIAZIDE	1	5828	53	117929454	381.79 (52.79-2761.27)	381.73 (52.8-2759.88)	1 (-1.08-3.07)	374.68 (51.81-2709.81)
SIMVASTATIN	1	178245	53	117757037	12.47 (1.72-90.14)	12.46 (1.72-90.14)	0.88 (-1.19-2.96)	12.25 (1.69-88.6)
SELEXIPAG	1	101421	53	117833861	21.92 (3.03-158.52)	21.92 (3.03-158.51)	0.93 (-1.14-3.01)	21.53 (2.98-155.72)
