# Supplementary material for: Drugs Associated with Increased Urine Oxalate Using FAERS and the VigiAccess Database
Source: Research Square preprint supplement (doi:10.21203/rs.3.rs-6403518/v1), 2025-05-20
Supplement: Supplementary file 3 [file c9ba626fedd131ab82cdbfba.xlsx]

## Sheet: Sheet1
Table1 Demographics of the data
	count n=390	Percentage
Gender
Female(%)	202	51.79
Male(%)	188	48.21
age
<18(%)	7	1.79
18-44(%)	149	38.21
45-64(%)	156	40
≥65(%)	78	20
Reported person
Physician(%)	160	41.03
Pharmacist(%)	139	35.64
Consumer(%)	52	13.33
Other health-professional(%)	33	8.46
Not Specified(%)	7	1.79
Reporting region
United States of America(%)	156	40
Canada(%)	110	28.21
United Kiongdom(%)	78	20
France(%)	26	6.67
Netherlands(%)	13	3.33
Germany(%)	7	1.79
Time to event
0-30d(%)	124	31.79
31-180d(%)	204	52.31
181-360d(%)	55	14.1
>360d(%)	7	1.79
Reporting year
2008(%)	13	3.33
2010(%)	26	6.67
2012(%)	7	1.79
2013(%)	13	3.33
2014(%)	13	3.33
2016(%)	13	3.33
2017(%)	13	3.33
2018(%)	20	5.13
2019(%)	52	13.33
2020(%)	71	18.21
2021(%)	26	6.67
2022(%)	71	18.21
2023(%)	20	5.13
2024(%)	33	8.46
